# Supplementary material for: CRISPR interference provides increased cell type-specificity compared to the Cre-loxP system
Source: PubMed Central journal article supplement — iScience. 2023 Jul 20;26(8):107428. doi: 10.1016/j.isci.2023.107428 (PMC10415806; doi:10.1016/j.isci.2023.107428), 2023-07-20
Supplement: mmc1.pdf [file mmc1.pdf]

**Supplemental information**

**CRISPR interference provides increased cell  
type-specificity compared to the Cre-loxP system**

**Dominique J. Laster, Nisreen S. Akel, James A. Hendrixson, Alicen James, Julie A. Crawford, Qiang Fu, Stuart B. Berryhill, Jeff D. Thostenson, Intawat Nookaew, Charles A. O'Brien, and Melda Onal**

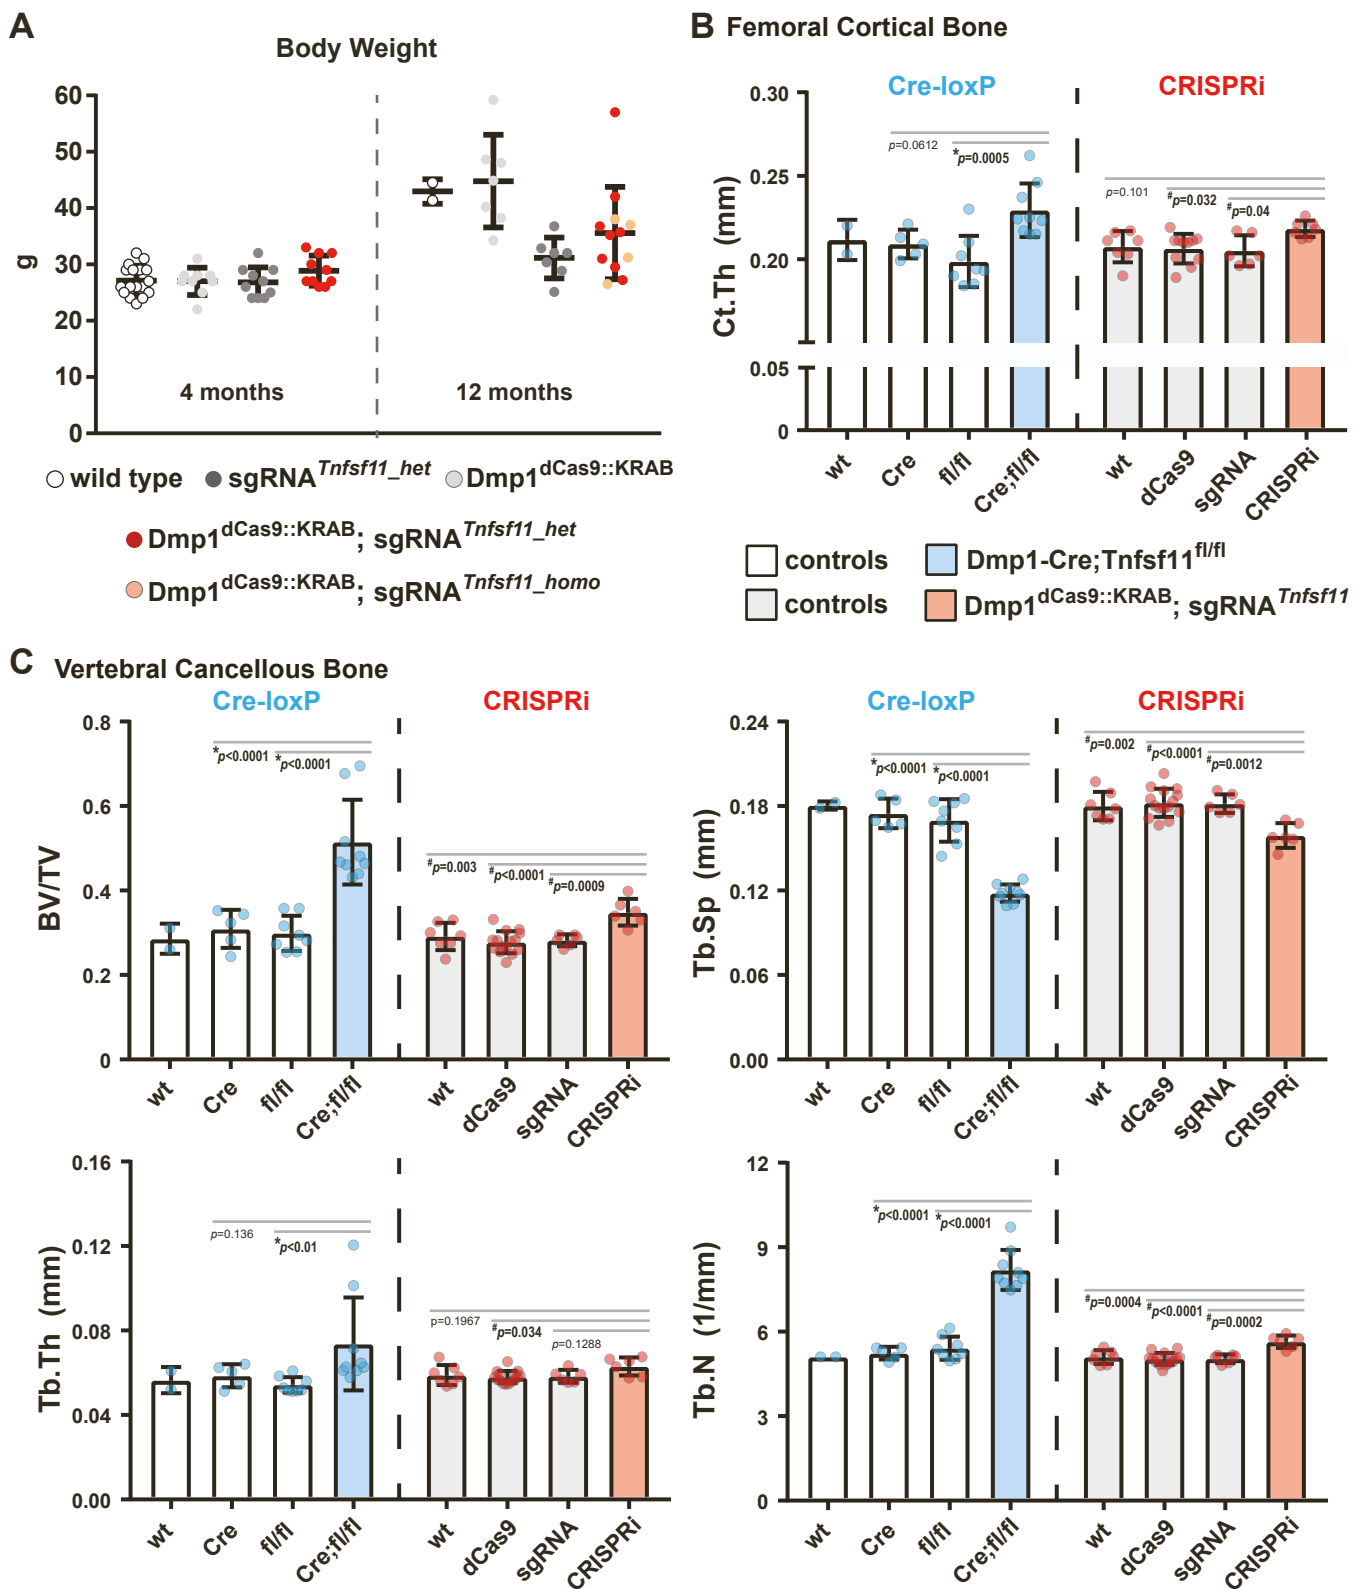

**Supplementary Figure 1. *Tnfsf11* loss-of-function using *Dmp1*-driven Cre-loxP or *Dmp1*-driven CRISPRi, supplemental to Figure 2. **A**, Body weight of female *Dmp1*<sup>dCas9::KRAB</sup>;sgRNA *Tnfsf11* mice and their littermate controls (wild type, *Dmp1*<sup>dCas9::KRAB</sup>, and sgRNA *Tnfsf11* mice) were measured at 4 and 12 months of age. n=2-17 mice/group. One-way ANOVA with Tukey adjustment was performed to compare *Dmp1*-driven CRISPRi to controls (all p>0.05). **B-C**, The skeletal phenotype of 6-month-old male mice was analyzed by  $\mu$ CT. **B**, Cortical thickness (Ct. Th) was measured at the femoral midshaft. **C**, Cancellous bone mass, and architecture were analyzed as bone volume over tissue volume (BV/TV), trabecular separation (Tb. Sp), trabecular thickness (Tb. Th), and trabecular number (Tb. N) in lumbar vertebrae 4. For deletion of *Tnfsf11* using Cre-loxP n=2-9 mice/group; \*, p<0.05 comparing *Dmp1*-Cre; *Tnfsf11*<sup>fl/fl</sup> to its littermate controls using one-way ANOVA with Tukey adjustment. For suppression of *Tnfsf11* using *Dmp1*-driven CRISPRi n=6-15 mice/group; #, p<0.05 comparing *Dmp1*-driven CRISPRi to each littermate control using one-way ANOVA with Tukey adjustment. Individual Tukey p values for each comparison are provided in the graphs. All data presented as mean  $\pm$  stdev.**

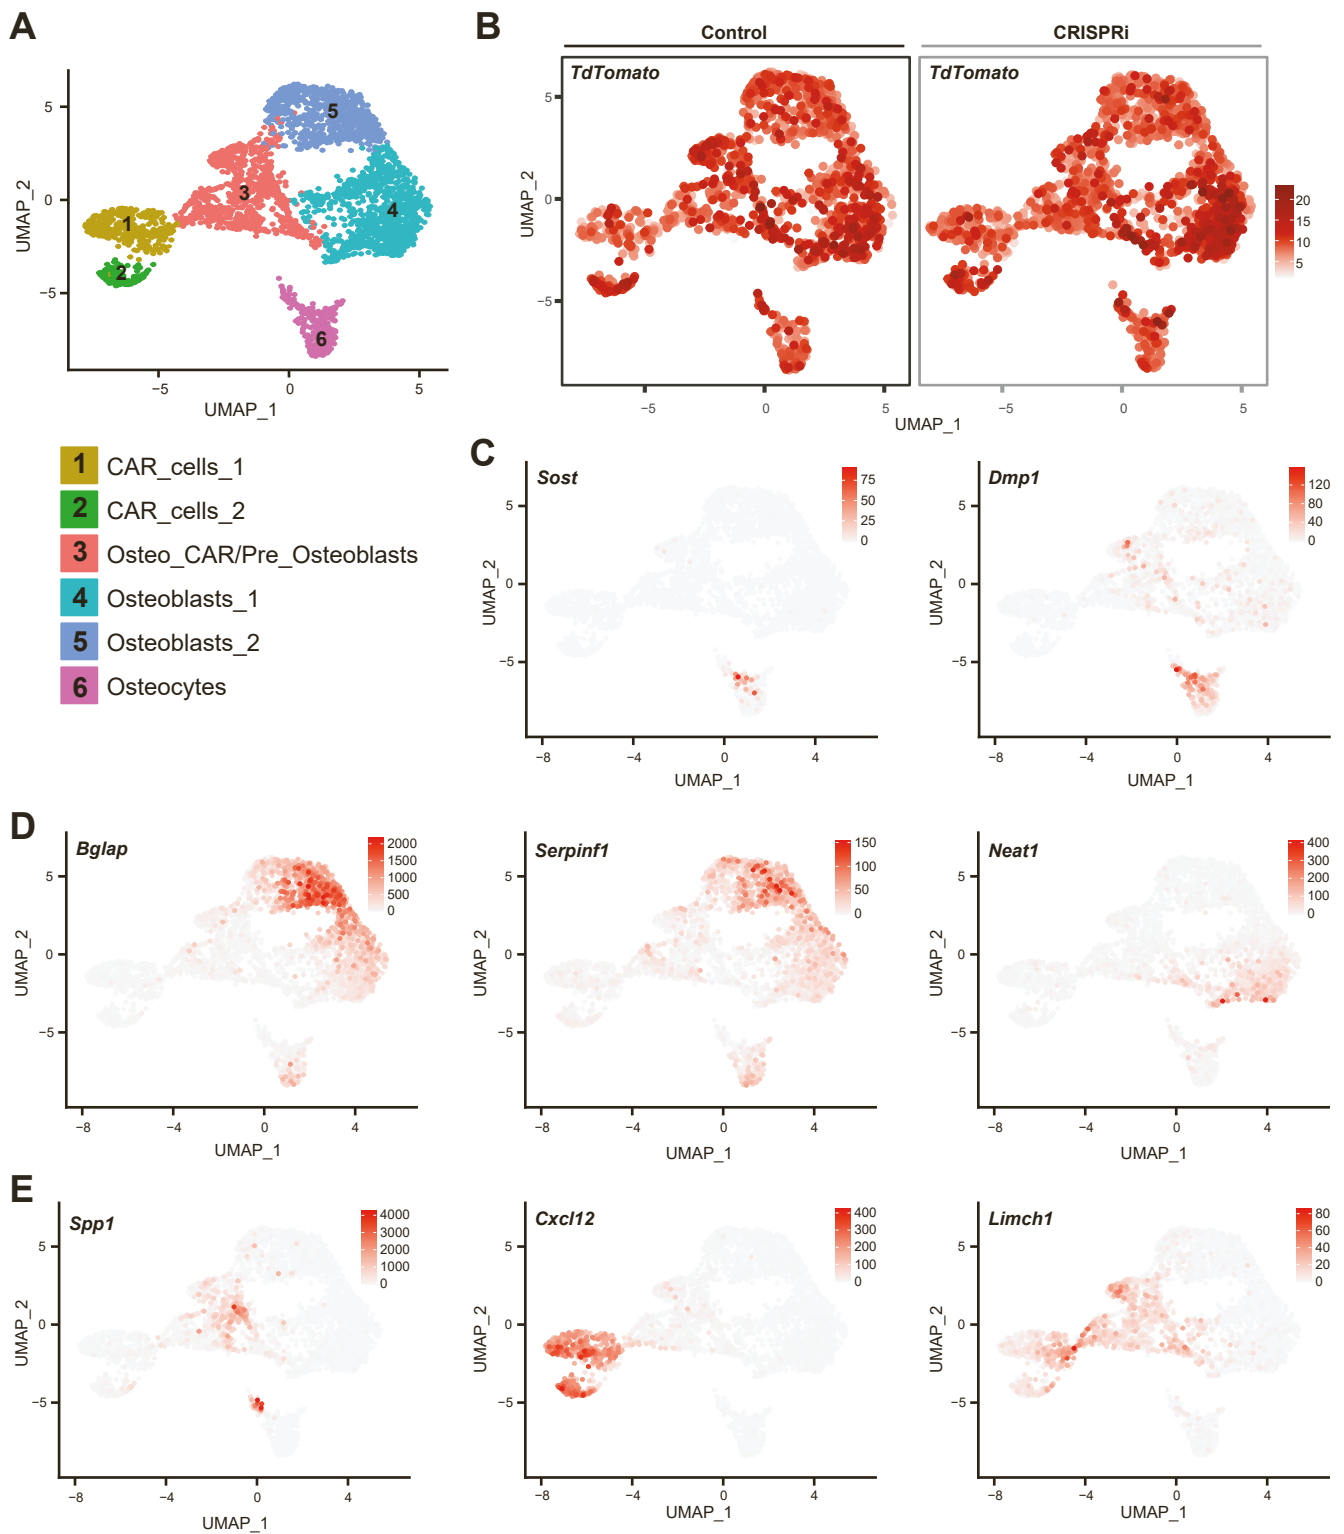

**Supplementary Figure 2. scRNA-seq clustering of TdTomato positive cells, supplemental to Figure 3.** Femur and tibia shafts were subjected to serial digestions (see methods). Cells from fractions 2 to 8 were collected for flow cytometry. **A-E**, tdTomato-positive cells were sorted and used for scRNA-seq. **B**, TdTomato transcript in Control and CRISPRi samples. **C-E**, Cell-clustering was performed using cluster-specific markers: **(C)** *Sost* and *Dmp1* (cluster 6, osteocytes); **(D)** *Bglap*, *Serpinf1* and *Neat1* (cluster 4&5, osteoblasts); **(E)** *Cxcl12* (cluster 1&2, CAR cells), *Spp1* and *Limch1* (cluster 3, osteocars).

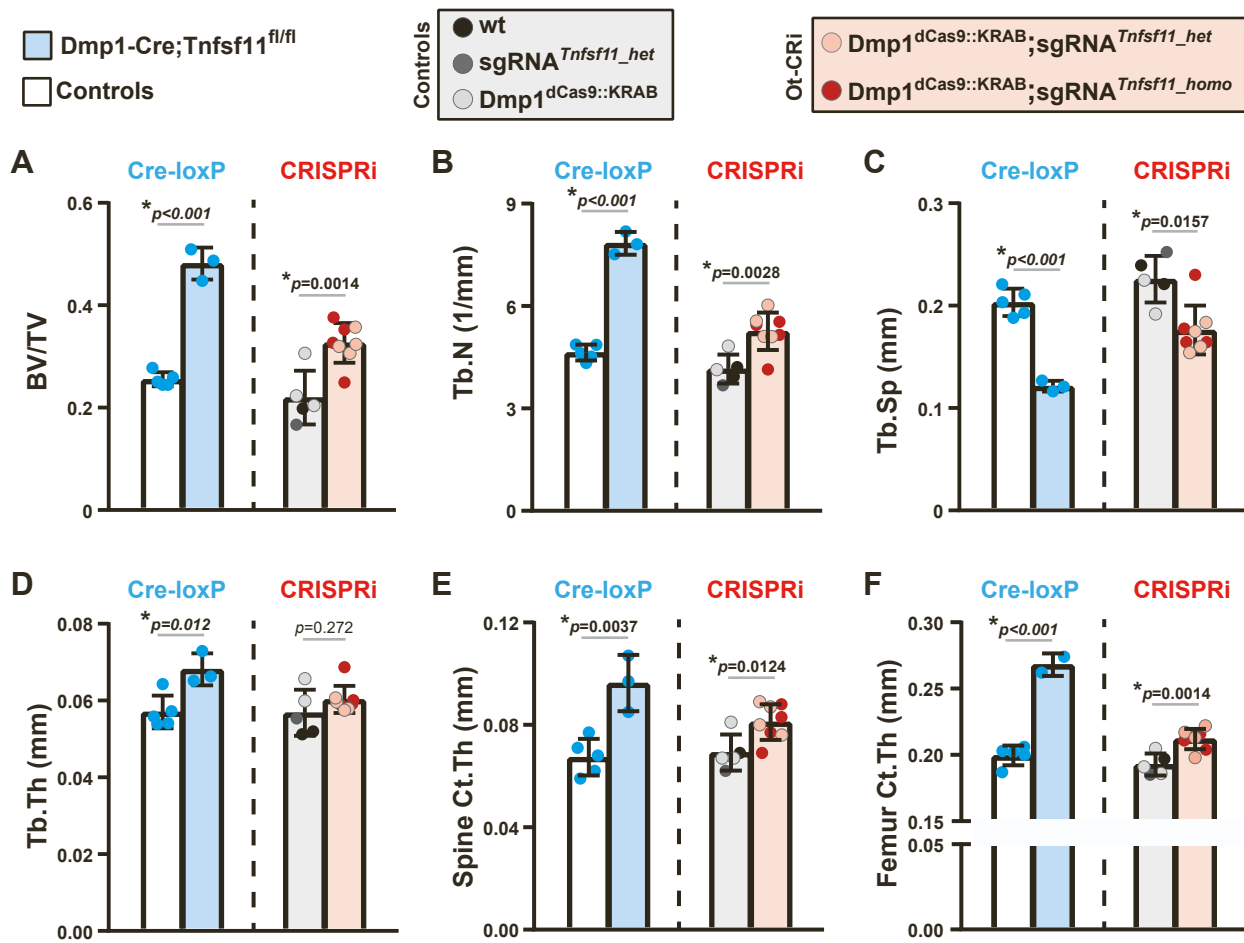

**Supplementary Figure 3. *Dmp1*-driven CRISPRi of *Tnfsf11* persists up to 12 months of age in male mice, supplemental to Figure 5.** Skeletal phenotype of male *Dmp1*-Cre;*Tnfsf11*<sup>fl/fl</sup> mice (blue bars, n=3) and their littermate controls (white bars, n=5); *Dmp1*<sup>dCas9::KRAB</sup>; sgRNA<sup>*Tnfsf11*</sup> mice (Ot-CRI, pink bars, n=8) and their littermate controls (wild type, *Dmp1*<sup>dCas9::KRAB</sup>, and sgRNA<sup>*Tnfsf11*</sup> mice, light grey bars, n=5) were assessed at 12 months of age by  $\mu$ CT analysis. **A-D** Cancellous bone mass and architecture were analyzed as bone volume over tissue volume (BV/TV) (A), trabecular number (Tb. N) (B), trabecular separation (Tb. Sp)(C), and trabecular thickness (Tb. Th) (D) in lumbar vertebrae 4 (L4). **E-F**, Vertebral cortical thickness (Spine Ct. Th) (e) was determined on the ventral cortical wall of L4 and the femoral cortical thickness (Femur Ct. Th) (F) was measured at femoral midshaft. \*, p<0.05 comparing *Dmp1*<sup>dCas9::KRAB</sup>; sgRNA<sup>*Tnfsf11*</sup> mice (CRISPRi) or *Dmp1*-Cre; *Tnfsf11*<sup>fl/fl</sup> mice to their corresponding control mice using t-test or Rank sum test (in case of non-normality, specifically Tb.Sp and Tb.N of CRISPRi). Individual p values for each comparison are provided in the graphs. All data presented as mean  $\pm$  stdev.

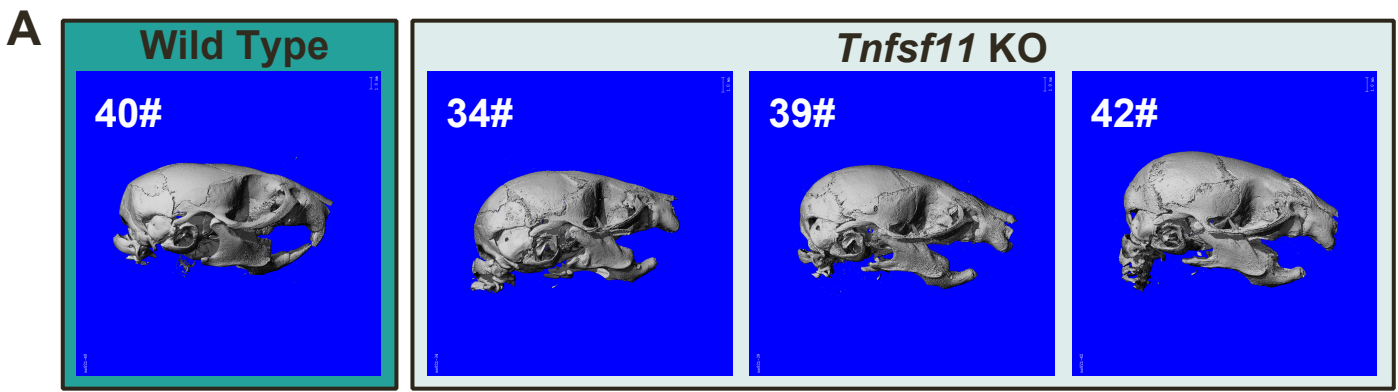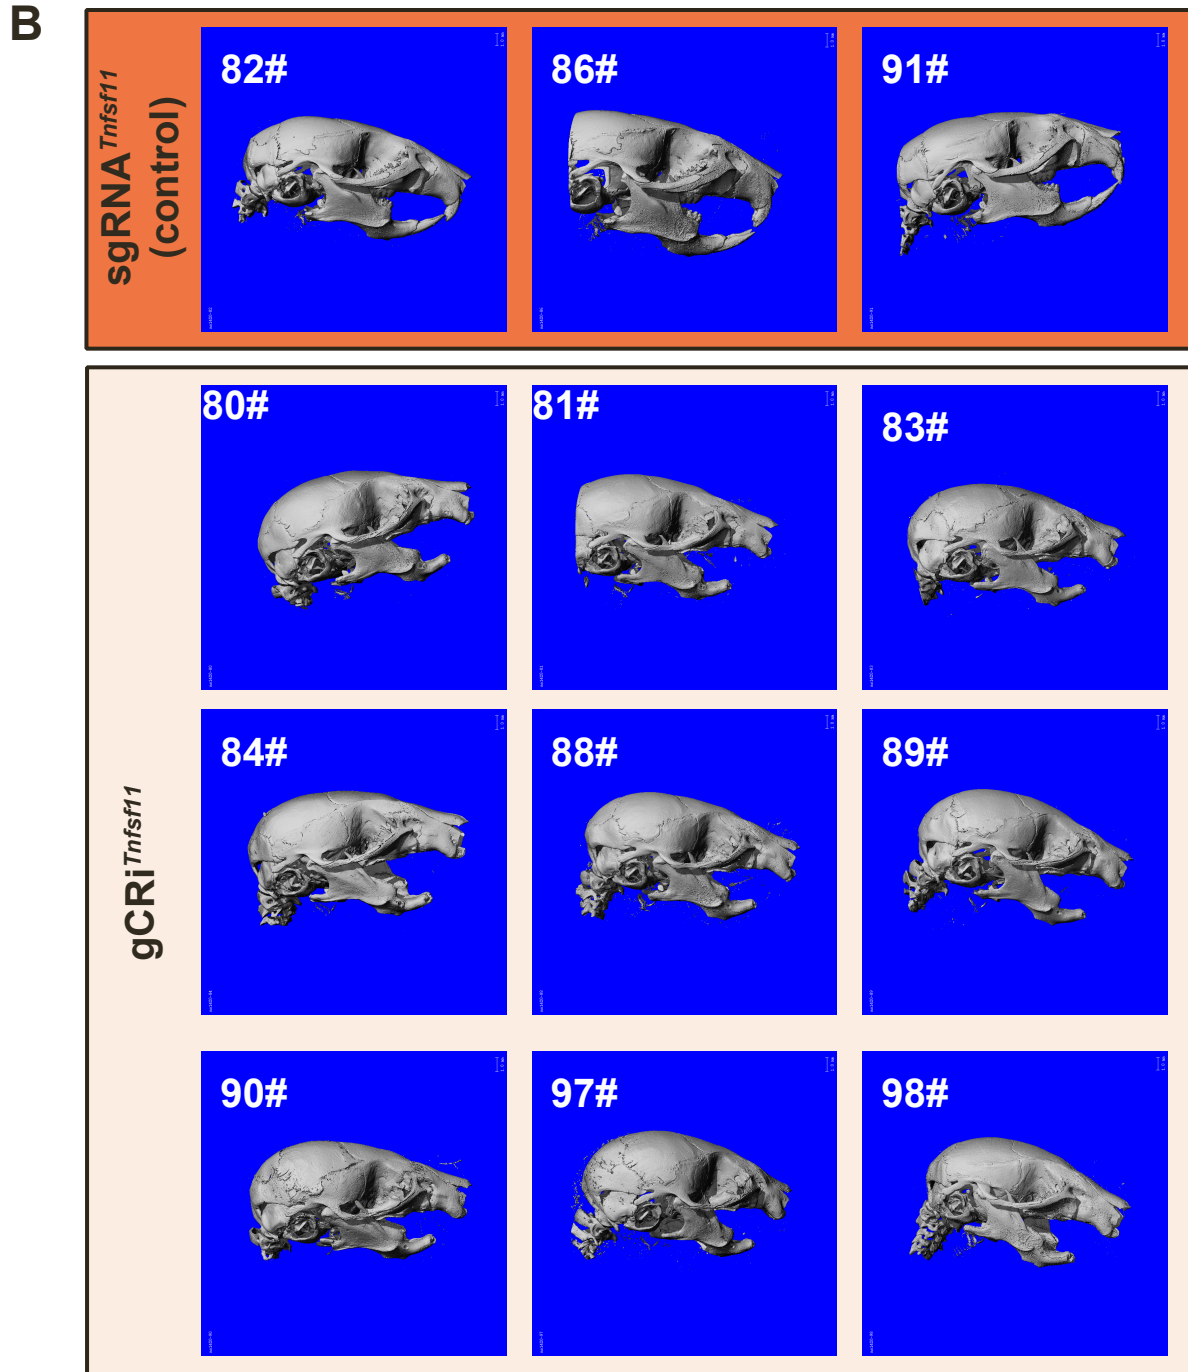

**Supplementary Figure 4. Global suppression of *Tnfsf11* using CRISPRi prevents tooth eruption supplemental to Figure 1. A-B,  $\mu$ CT analysis of skulls of 5-week-old (A) wild type and their littermate *Tnfsf11* knockout (*Tnfsf11* KO) mice, and (B)  $H11^{dCas9-KRAB}; sgRNA^{Tnfsf11}$  mice (gCRI<sup>*Tnfsf11*</sup>) and their littermate controls (sgRNA<sup>*Tnfsf11*</sup> \_Control).**
